# Supplementary material for: The impact of spatiotemporal variability in atmospheric CO 2 concentration on global terrestrial carbon fluxes
Source: Copernicus journal article supplement (doi:10.5194/bg-2018-187), 2018-04-20
Supplement: Supplementary file 1 [file bg-2018-187-supplement.pdf]

Supplement

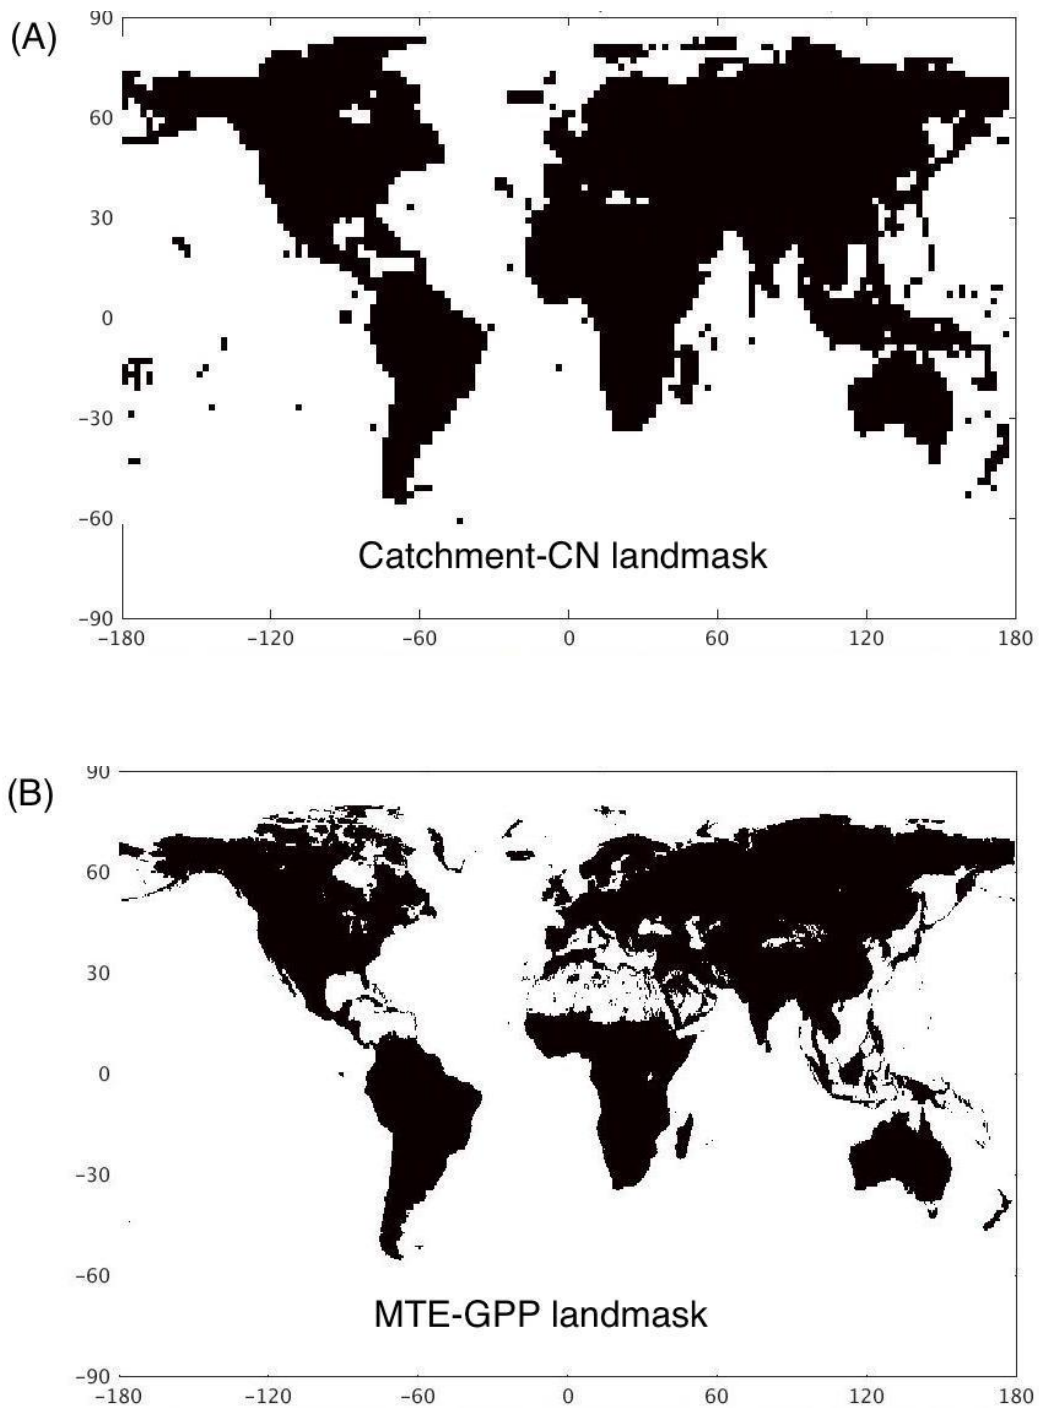

Fig. S1. The land masks used in (a) the Catchment-CN model simulations and (b) the MTE-GPP dataset.

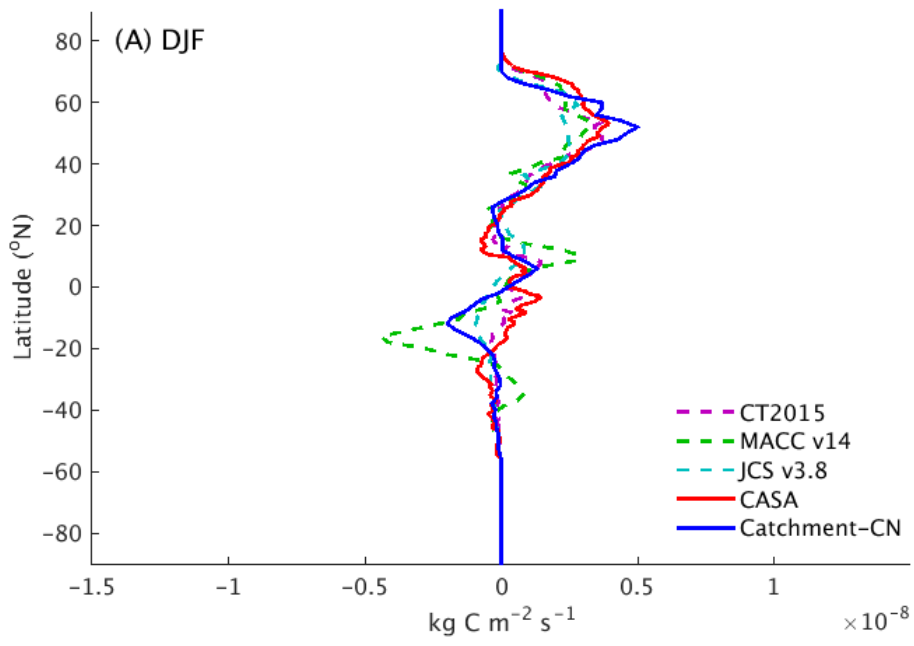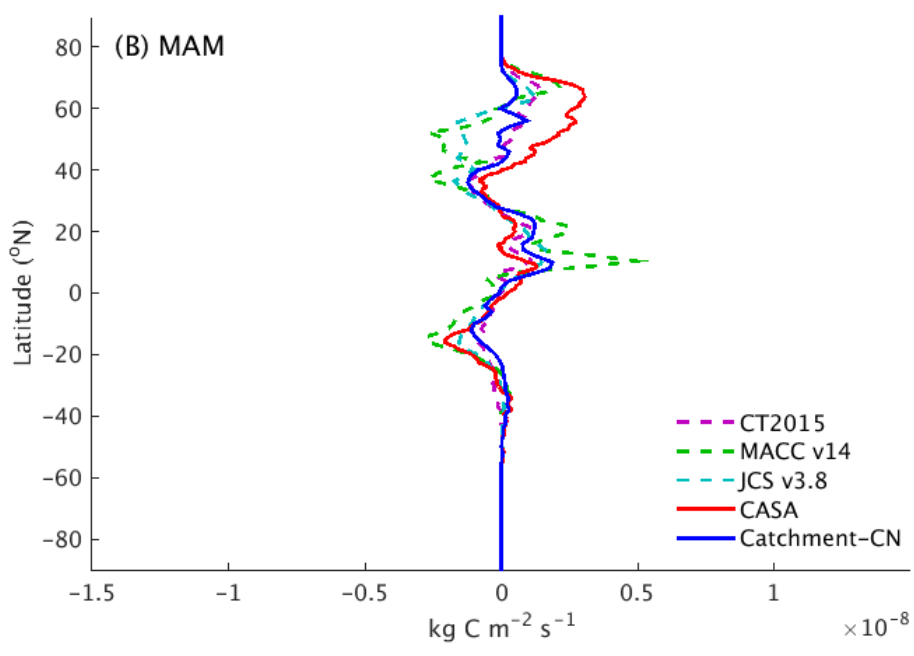

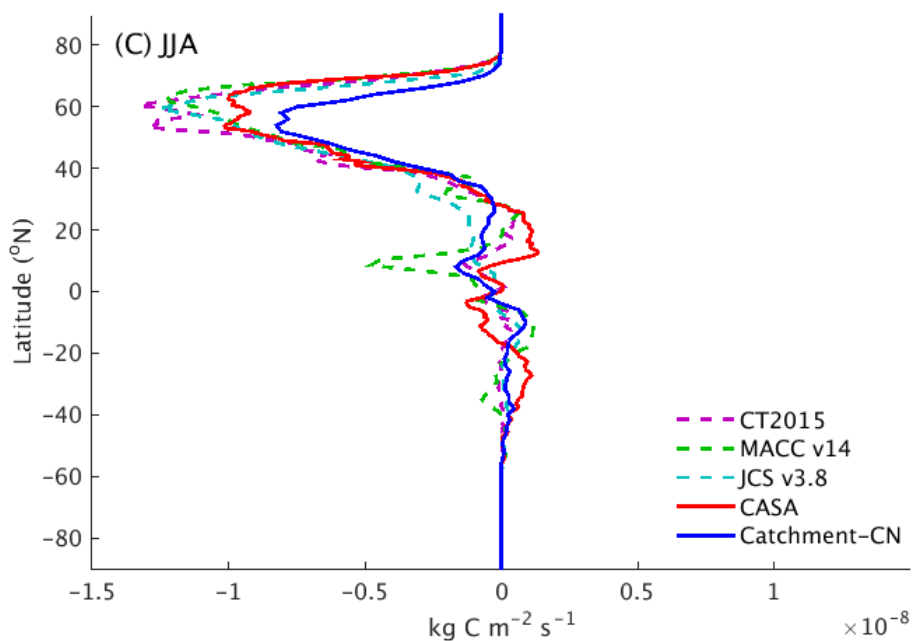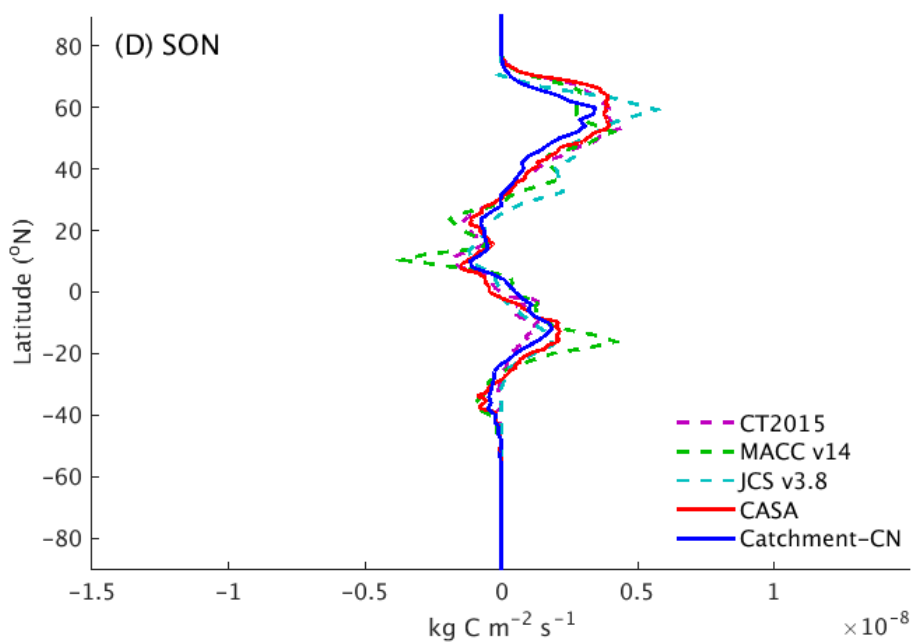

Fig. S2. Mean seasonal NBP of (a) DJF, (b) MAM, (c) JJA and (d) SON, of the Catchment-CN model (blue), the CASA-GFED3 model (red), and inversions (dotted lines) for the period of 2004-2014.

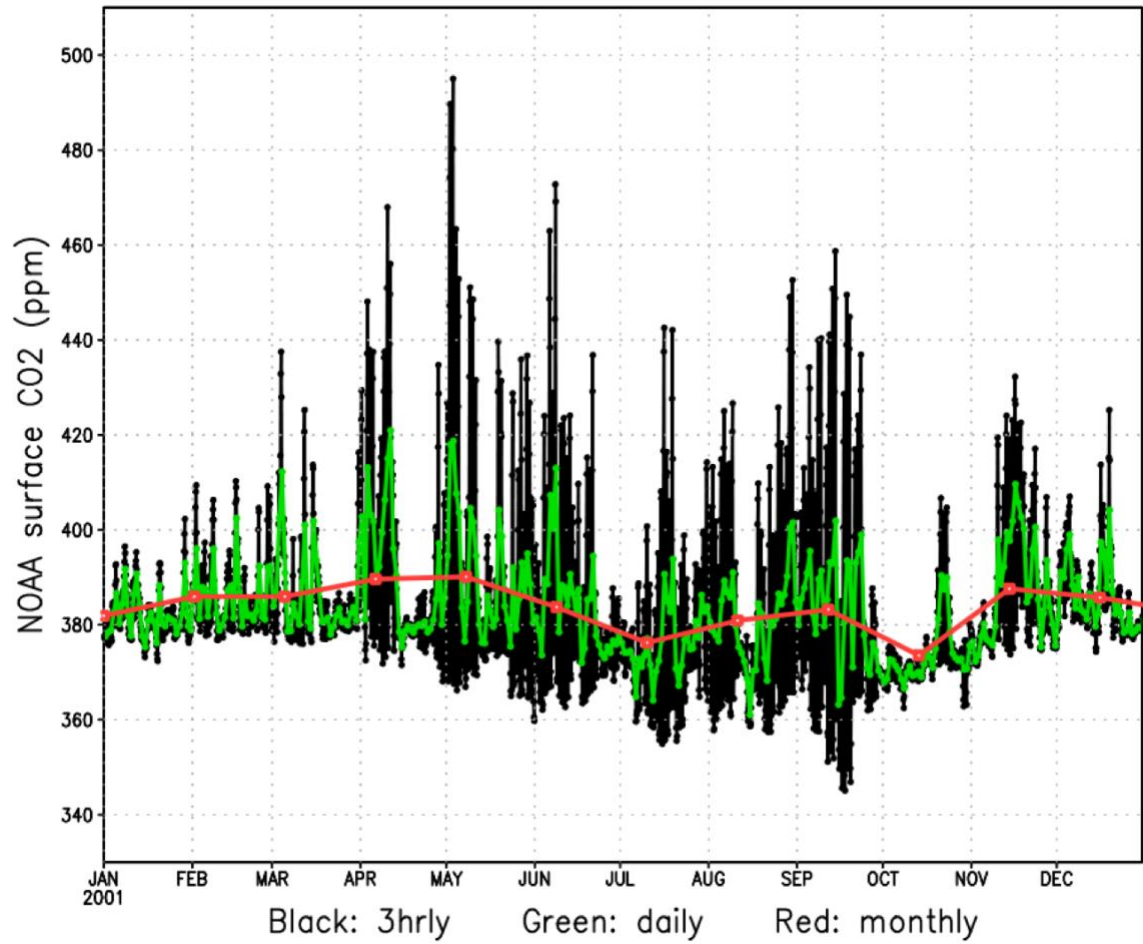

Fig. S3. An example of the atmospheric CO<sub>2</sub> from the CarbonTracker at 37N and 79W for year 2001. The amplitude of the diurnal cycle (black) varies as much as 120ppm in early growing season, while the seasonal change of CO<sub>2</sub> (red) varies only about 20ppm. Green indicates the mean daily CO<sub>2</sub> and red the mean monthly CO<sub>2</sub>.

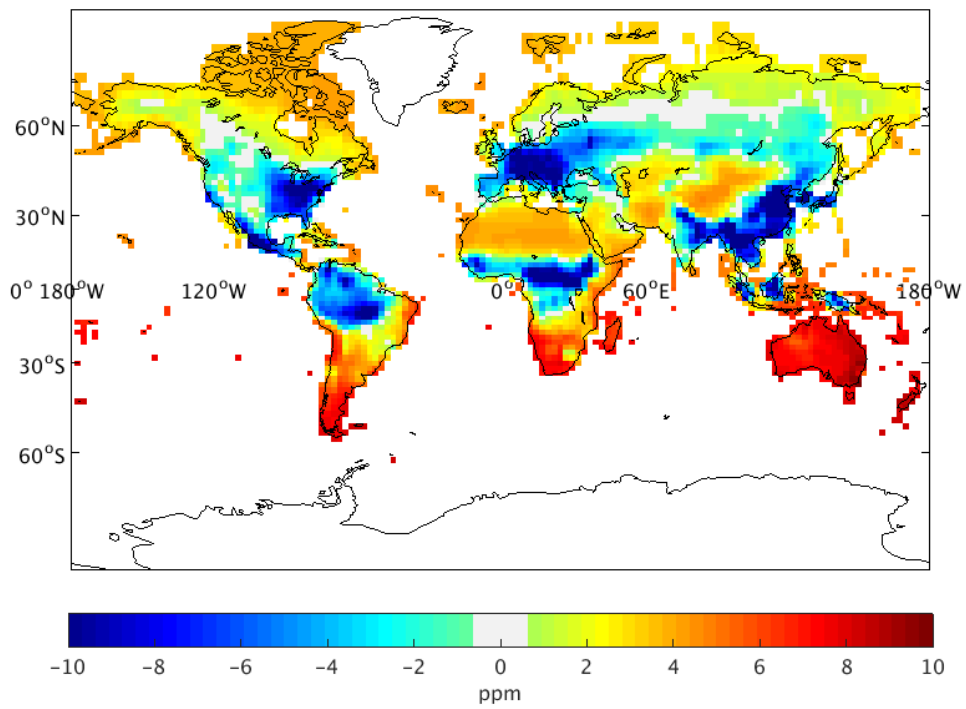

Fig. S4. Difference between the CO<sub>2</sub> concentration (ca. 390ppm) imposed in cCO<sub>2</sub> and the time mean of the concentrations imposed in aCO<sub>2</sub>.

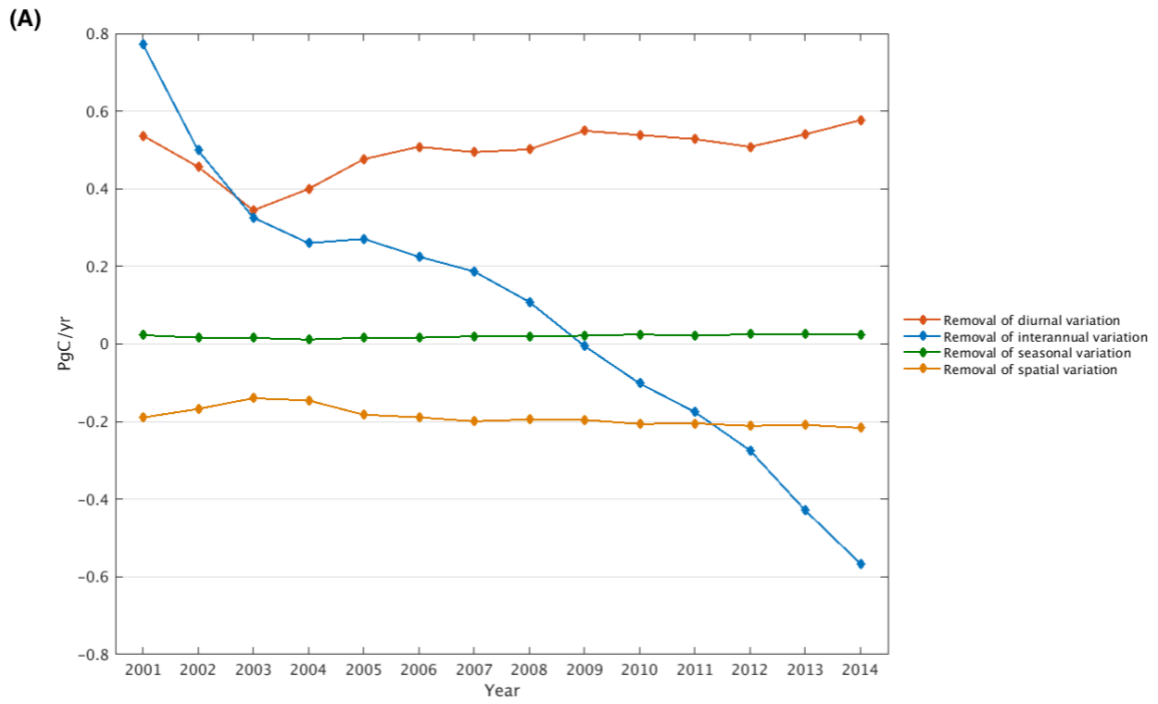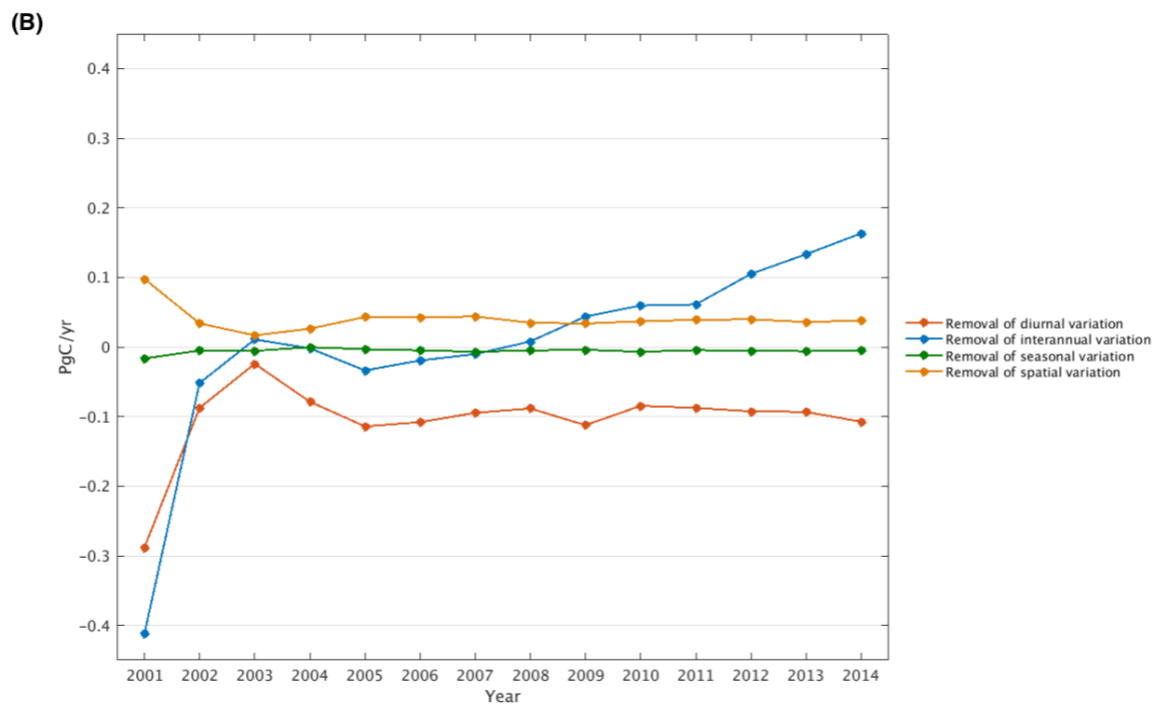

Fig. S5. Differences in annual mean (a) GPP and (b) NBP for 2001-2014.

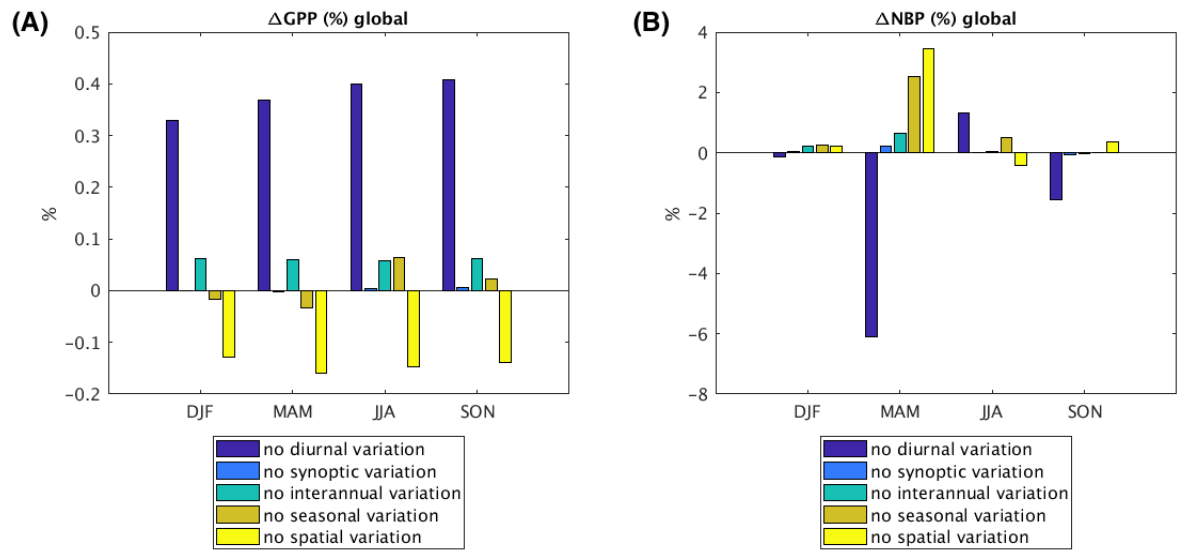

Fig. S6. Difference in mean global (a) GPP and (b) NBP for DJF, MAM, JJA, and SON, by removing each variability of the atmospheric CO<sub>2</sub> concentrations.
