# Supplementary material for: The impact of spatiotemporal variability in atmospheric CO 2 concentration on global terrestrial carbon fluxes
Source: Copernicus journal article supplement (doi:10.5194/bg-2018-187), 2018-04-20
Supplement: Supplementary file [file bg-2018-187-AC2-supplement.pdf]

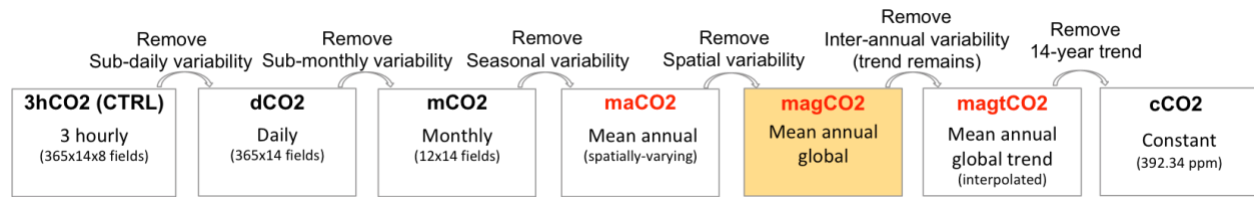

Figure L1: Revised schematic figure of the experimental design (revised Figure 1 in the manuscript). Three additional simulations are highlighted in red for the reviewer's convenience.

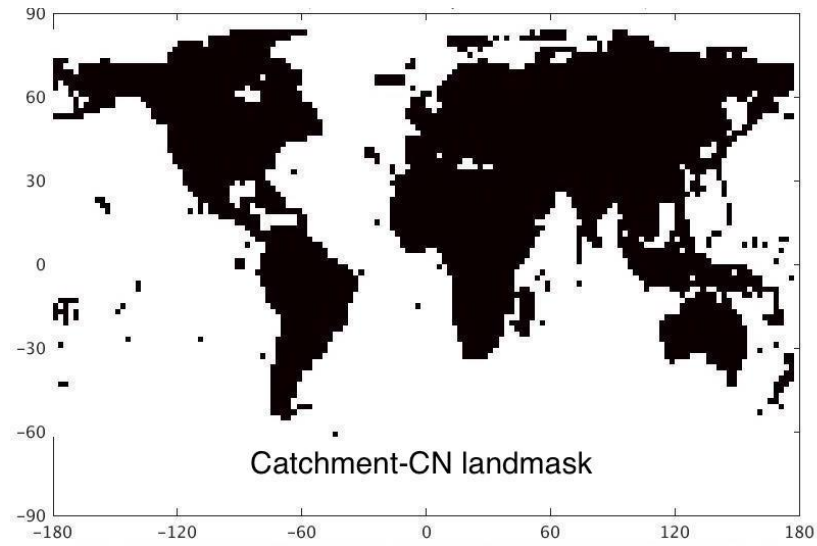

Figure L2a. Landmask of Catchment-CN (previous)

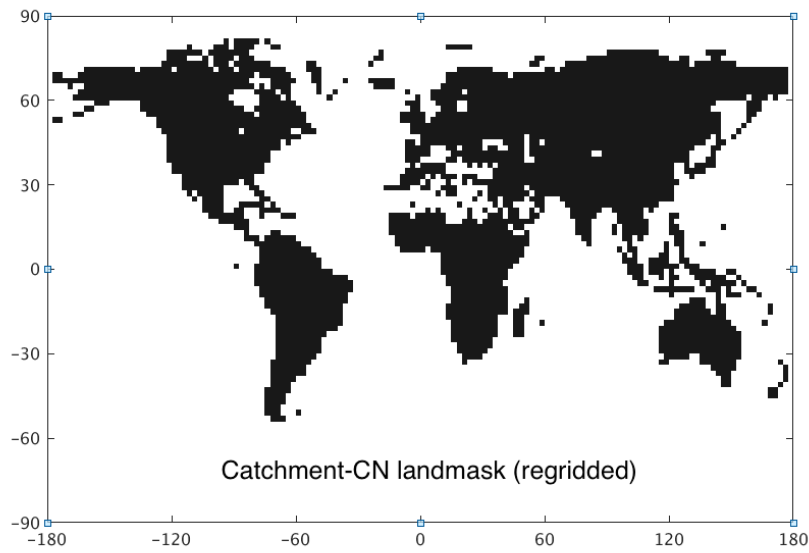

Figure L2b. Landmask of Catchment-CN (regridded)
